# Supplementary material for: Interoperator reliability of an on-site machine learning-based prototype to estimate CT angiography-derived fractional flow reserve
Source: HighWire-hosted journal article supplement (doi:10.1136/openhrt-2021-001951), 2022-03-01
Supplement: openhrt-2021-001951supp002_data_supplement.pdf [file openhrt-2021-001951supp002_data_supplement.pdf]

Supplemental table 1. Intra-investigator agreement

| Segment                           | ICC            |               |                |               | Difference                     |                                           |                                |                                           |
|-----------------------------------|----------------|---------------|----------------|---------------|--------------------------------|-------------------------------------------|--------------------------------|-------------------------------------------|
|                                   | Investigator 1 |               | Investigator 2 |               | Investigator 1                 |                                           | Investigator 2                 |                                           |
|                                   | 95% CI         |               | 95% CI         |               | Absolute<br>Mean<br>Difference | Bland<br>Altman<br>Limits of<br>Agreement | Absolute<br>Mean<br>Difference | Bland<br>Altman<br>Limits of<br>Agreement |
| <i>Per Patient</i>                | 0.993          | 0.989 - 0.996 | 0.992          | 0.987 - 0.995 | 0.009                          | -0.023 -<br>0.027                         | 0.009                          | -0.026 -<br>0.030                         |
| <i>Per-Segment</i>                | 0.981          | 0.977 - 0.984 | 0.971          | 0.966 - 0.975 | 0.017                          | -0.064 -<br>0.068                         | 0.015                          | -0.078 -<br>0.082                         |
| <i>Per-Segment<br/>(Proximal)</i> | 0.988          | 0.985 - 0.991 | 0.952          | 0.939 - 0.963 | 0.008                          | -0.027 -<br>0.032                         | 0.008                          | -0.060 -<br>0.064                         |
| <i>Per-Segment<br/>(Distal)</i>   | 0.977          | 0.971 - 0.981 | 0.971          | 0.964 - 0.977 | 0.023                          | -0.084 -<br>0.086                         | 0.02                           | -0.091 -<br>0.094                         |
