# Supplementary figures and images for: Interoperator reliability of an on-site machine learning-based prototype to estimate CT angiography-derived fractional flow reserve
Source: HighWire-hosted journal article supplement (doi:10.1136/openhrt-2021-001951), 2022-03-01

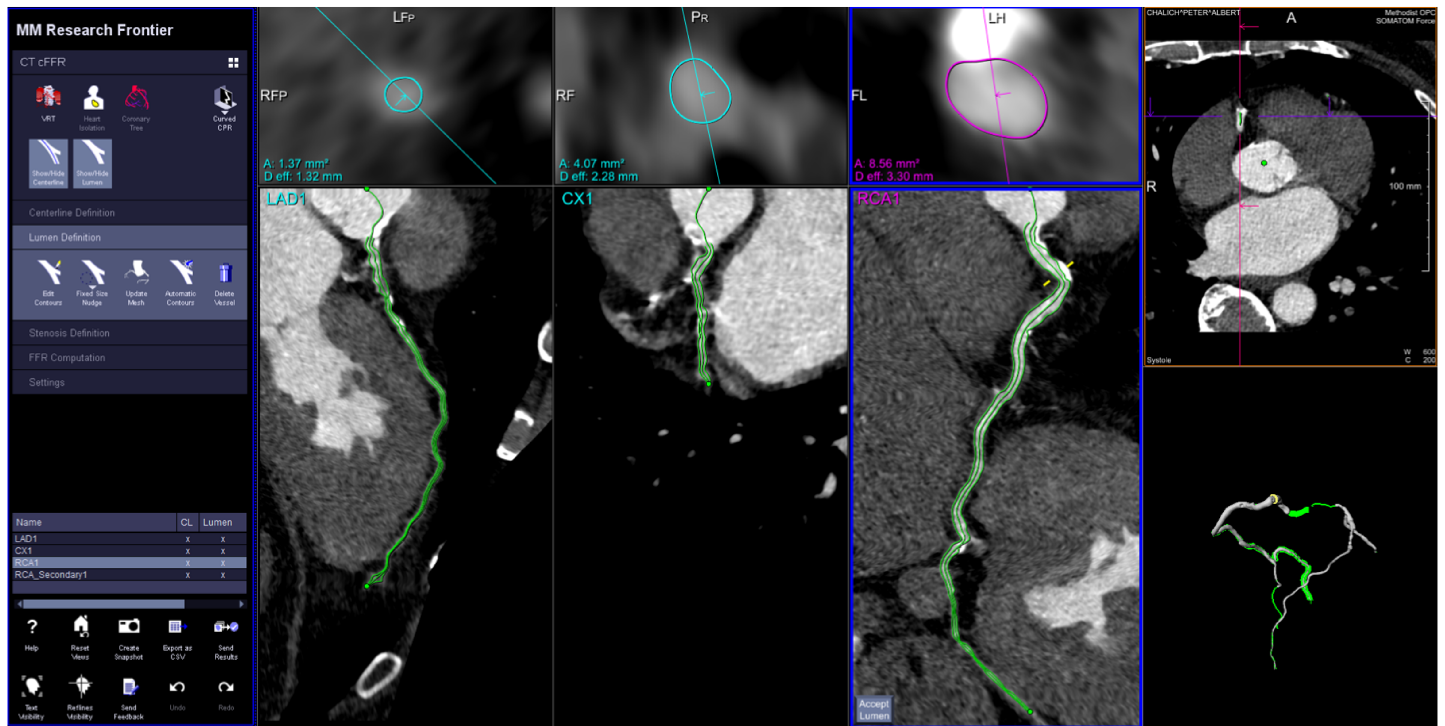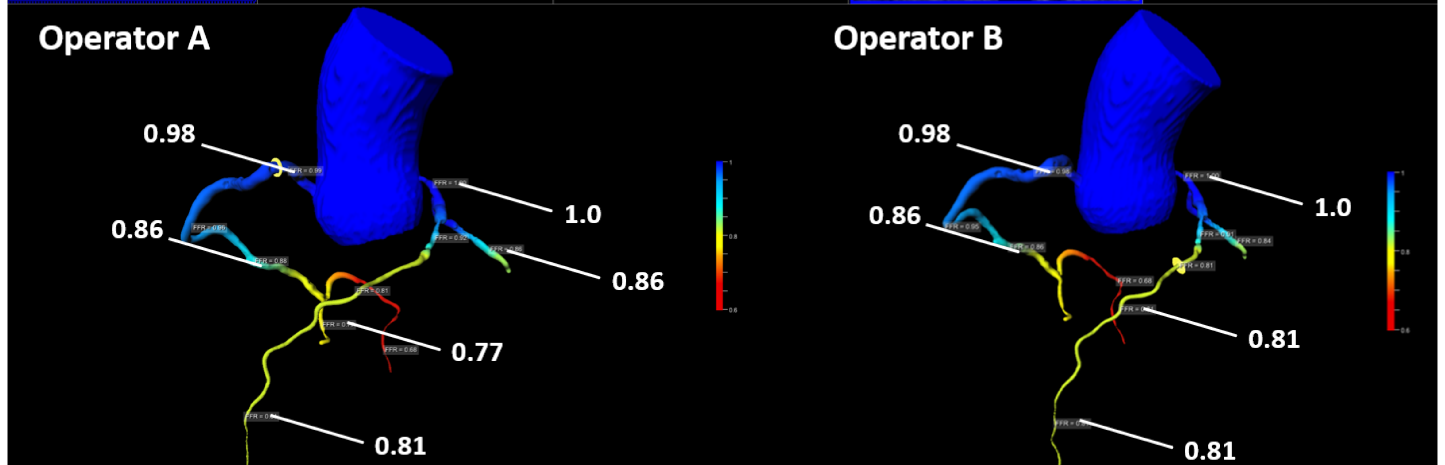

Supplement: openhrt-2021-001951supp001_data_supplement.pdf [file openhrt-2021-001951supp001_data_supplement.pdf]
